## Varia

---

### **12th International Congress of Internal Medicine**

The Congress, under auspices of The International Society of Internal Medicine (I. S. I. M.) and The Israel Academy of Sciences and Humanities will be held on September 8–13, 1974 in Tel-Aviv, Israel.

Congress language: English. Simultaneous translation may be provided.

For further information and for registration forms apply to: The Secretariat, 12th International Congress of Internal Medicine, P. O. Box 16271, *Tel-Aviv* (Israel).
